# Supplementary material for: Inductions of granulosa cell luteinization and cumulus expansion are dependent on the fibronectin-integrin pathway during ovulation process in mice
Source: PubMed Central journal article supplement (PMC5805282; doi:10.1371/journal.pone.0192458), 2018-02-08

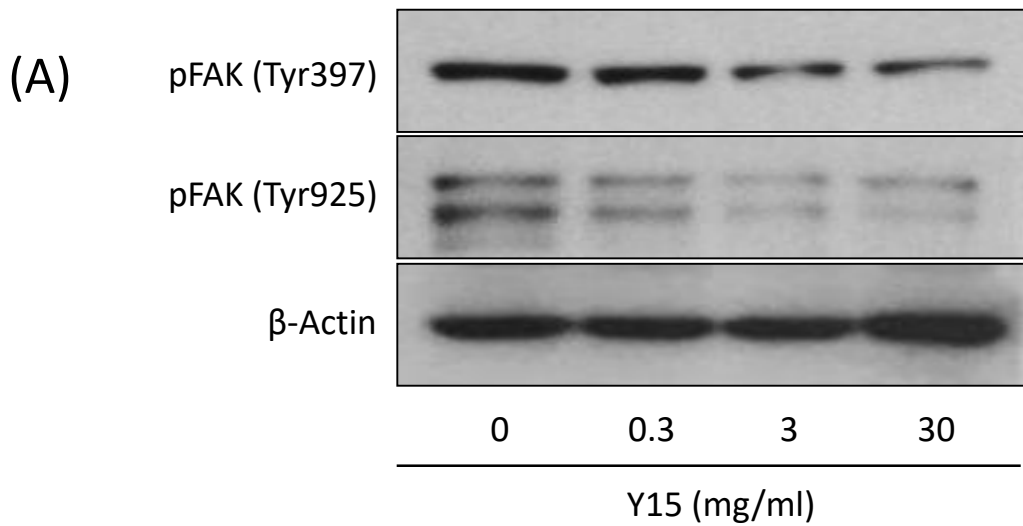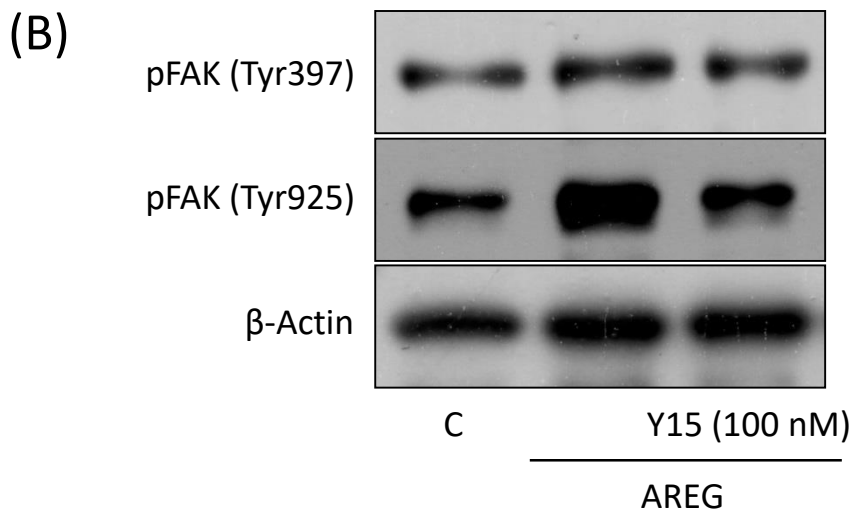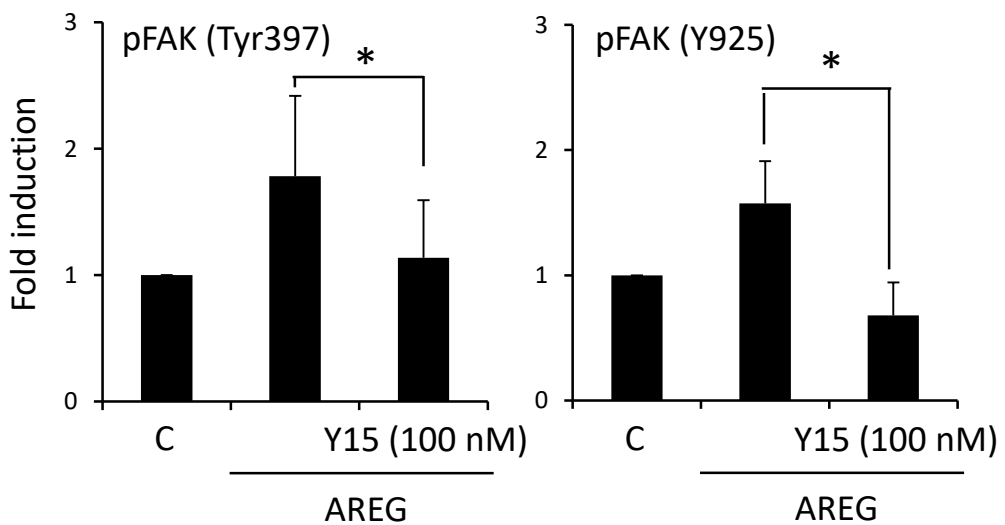

Supplement: pone.0192458.s001.pdf [file pone.0192458.s001.pdf]
